# Supplementary material for: Association of the EGF-TM7 receptor CD97 expression with FLT3-ITD in acute myeloid leukemia
Source: PubMed Central journal article supplement (PMC4770738; doi:10.18632/oncotarget.5661), 2015-10-07
Supplement: oncotarget-06-38804-s001.pdf [file oncotarget-06-38804-s001.pdf]

## SUPPLEMENTARY FIGURE

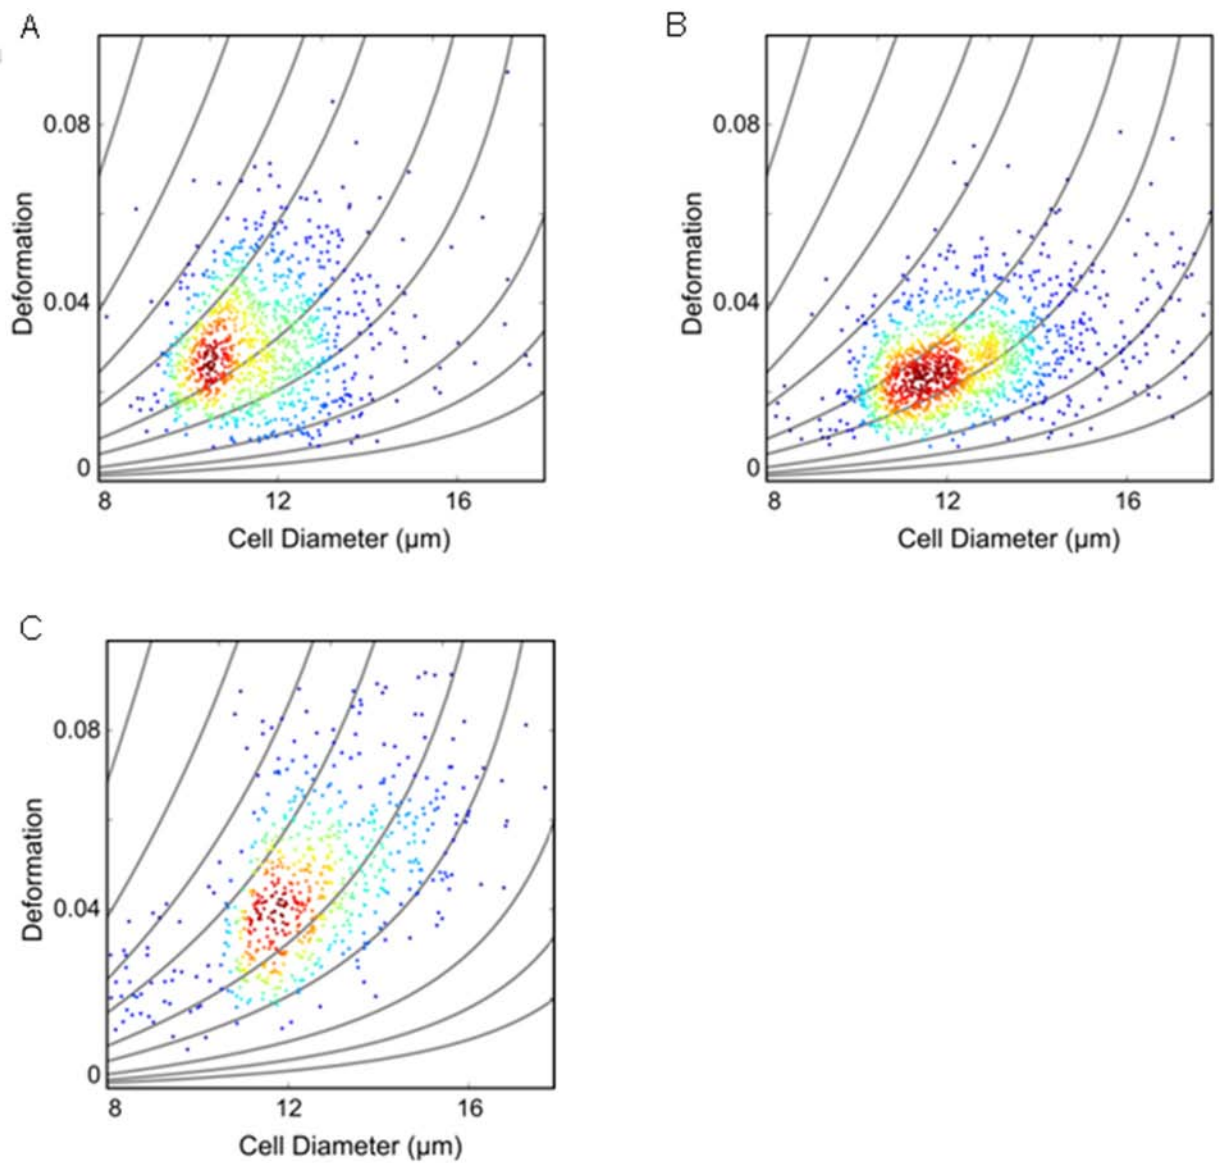

**Supplementary Figure S1: RT-DC on MV-11 cells.** Mechanical properties of **A.** wildtype, **B.** empty vector and **C.** down-regulated MV-11 cells each carried out in a separate experiment at a flow rate of 0.04  $\mu\text{l/s}$  in a  $20\ \mu\text{m} \times 20\ \mu\text{m}$  channel.
